# Supplementary material for: „Gaming“ im Kindesalter
Source: Springer Nature journal article supplement (doi:10.1007/s00278-020-00488-w), 2021-01-27
Supplement: MOESM1 [file 18804022]

**Online-Zusatzmaterial (ESM)**

**Gaming Disorder Test – Fremdbericht für Kinder**

Die Fragen unten beziehen sich auf die Gaming-Aktivitäten **Ihres Kindes** während des letzten Jahres (genauer gesagt bezogen auf die letzten zwölf Monate). Damit ist jede Art von Gaming-Aktivität gemeint, die auf dem Computer/Laptop oder auf Gaming-Konsolen oder auf anderen Geräten wie Mobiltelefon/Smartphone/Tablet, sowohl online als auch offline, erfolgt ist.

**Mein Kind** spielt Computerspiele (mindestens in einem der genannten Bereiche). (Ja / Nein)

**(Falls ja:)** Bitte geben Sie an, wie häufig die folgenden Probleme im Durchschnitt über die letzten zwölf Monate hinweg bis zum heutigen Tage bei Ihrem Kind aufgetreten sind.

1. Mein Kind hat Probleme gehabt, ihre/seine Gaming-Aktivitäten zu kontrollieren.

2. Mein Kind hat dem Gaming steigende Priorität gegenüber anderen Lebensinteressen und täglichen Aktivitäten eingeräumt.

3. Mein Kind ist dem Gaming weiterhin nachgegangen, obwohl negative Konsequenzen entstanden sind (z. B. in der Familie oder Schule).

4. Mein Kind hat bedeutsame Probleme in ihrem/seinem Leben aufgrund der Stärke des Gaming-Verhaltens erfahren (z. B. persönlich, familiär, sozial, in der Schule).

Antwortmöglichkeiten: Nie, Selten, Manchmal, Oft, Sehr oft
